# Supplementary material
Source: PubMed Central journal article supplement (PMC3366115)
Supplement: NIHMS366886-supplement-2.pdf [file NIHMS366886-supplement-2.pdf]

**Suppl. Table 1:** Chromosome positions, and homology percentages of the zebrafish orthologs and quantity of human mRNA injected of the 29 genes in the 16p11.2 CNV.

|                 | Zebrafish orthologs | Chromosome position<br>(Zv9/danRer7)             | Strand | Target % identity | Quantity of human mRNA<br>injected into 1-2 cell stage<br>embryos |
|-----------------|---------------------|--------------------------------------------------|--------|-------------------|-------------------------------------------------------------------|
| <i>BOLA2</i>    | 1                   | chr7:60030421-60039342                           | -      | 60%               | 50pg                                                              |
| <i>GIYD2</i>    | 1                   | chr7:66029387-66031325                           | -      | 49%               | 50pg                                                              |
| <i>SULT1A4</i>  | 1                   | chr8:48625738-48639872                           | -      | 49%               | 50pg                                                              |
| <i>SULT1A3</i>  | 1                   | chr8:48713195-48735311                           | -      | 48%               | 50pg                                                              |
| <i>SPN</i>      | no                  | N/A                                              | N/A    | N/A               | 50pg                                                              |
| <i>QPRT</i>     | no                  | N/A                                              | N/A    | N/A               | 50pg                                                              |
| <i>C16orf54</i> | no                  | N/A                                              | N/A    | N/A               | 50pg                                                              |
| <i>MAZ</i>      | 2                   | chr12:4357264-4363999<br>chr3:21186552-21332644  | -<br>- | 65%<br>40%        | 50pg                                                              |
| <i>PRRT2</i>    | 1                   | chr12:5758856-5773588                            | -      | 34%               | 50pg                                                              |
| <i>C16orf53</i> | 1                   | chr12:4314052-4322109                            | +      | 45%               | 50pg                                                              |
| <i>MVP</i>      | 1                   | chr3:15313013-15339124                           | -      | 68%               | 50pg                                                              |
| <i>CDIPT</i>    | 1                   | chr3:21338354-21350423                           | -      | 69%               | 50pg                                                              |
| <i>SEZ6L2</i>   | 1                   | chr3:14834186-14869326                           | -      | 53%               | 50pg                                                              |
| <i>ASPHD1</i>   | 1                   | chr3:14876537-14889287                           | +      | 47%               | 50pg                                                              |
| <i>KCTD13</i>   | 1                   | chr3:14818574-14832260                           | -      | 62%               | 50pg                                                              |
| <i>TMEM219</i>  | no                  | N/A                                              | N/A    | N/A               | 50pg                                                              |
| <i>TAOK2</i>    | 2                   | chr3:21351675-21379658<br>chr3:4487352-4509330   | -<br>- | 54%<br>54%        | 10pg                                                              |
| <i>HIRIP3</i>   | 1                   | chr3:14798115-14815085                           | -      | 30%               | 50pg                                                              |
| <i>INO80E</i>   | 1                   | chr16:12022983-<br>12031914                      | +      | 50%               | 50pg                                                              |
| <i>DOC2A</i>    | 1                   | chr3:15155116-15212760                           | +      | 63%               | 50pg                                                              |
| <i>C16orf92</i> | no                  | N/A                                              | N/A    | N/A               | 50pg                                                              |
| <i>FAM57B</i>   | 2                   | chr3:21133041-21152454<br>chr3:4330878-4343261   | -<br>- | 60%<br>60%        | 50pg                                                              |
| <i>ALDOA</i>    | 2                   | chr3:39561781-39571834<br>chr12:4732693-4750571  | +<br>- | 84%<br>84%        | 25pg                                                              |
| <i>PPP4C</i>    | 2                   | chr3:26790851-26798828<br>chr12:4644864-4658855  | +<br>- | 94%<br>98%        | 50pg                                                              |
| <i>TBX6</i>     | 1                   | chr12:4593057-4603583                            | +      | 20%               | 25ng                                                              |
| <i>YPEL3</i>    | 1                   | chr3:26843147-26848954                           | +      | 90%               | 50pg                                                              |
| <i>GDPD3</i>    | 2                   | chr12:4573551-4584390<br>chr3:26830240-26841515  | -<br>+ | 48%<br>47%        | 25pg                                                              |
| <i>MAPK3</i>    | 1                   | chr3:26812726-26823133                           | +      | 80%               | 50pg                                                              |
| <i>CORO1A</i>   | 2                   | chr7:19832691-19870773<br>chr3:31077483-31092481 | -<br>- | 58%<br>69%        | 50pg                                                              |

**Suppl. Table 2: Statistical significance of *in vivo* observations shown in suppl. Figure 6.** p-values based on two-tailed t-test comparison between co-injection of *KCTD13* mRNA and each gene present in the 16p11.2 CNV and injection of *KCTD13* mRNA alone.

|    | <b>mRNA injections</b> | <b>Comparison with <i>KCTD13</i> mRNA</b> |
|----|------------------------|-------------------------------------------|
| 1  | Control                | N/A                                       |
| 2  | <i>KCTD13</i>          | N/A                                       |
| 3  | <i>KCTD13+PRRT2</i>    | Not significant                           |
| 4  | <i>KCTD13+C16orf53</i> | Not significant                           |
| 5  | <i>KCTD13+QPRT</i>     | Not significant                           |
| 6  | <i>KCTD13+SEZ6L2</i>   | Not significant                           |
| 7  | <i>KCTD13+SULTA4</i>   | Not significant                           |
| 8  | <i>KCTD13+TBX6</i>     | Not significant                           |
| 9  | <i>KCTD13+YPRL3</i>    | Not significant                           |
| 10 | <i>KCTD13+BOLA</i>     | Not significant                           |
| 11 | <i>KCTD13+FAM57B</i>   | Not significant                           |
| 12 | <i>KCTD13+MAPK3</i>    | P<0.001                                   |
| 13 | <i>KCTD13+MVP</i>      | P<0.01                                    |
| 14 | <i>KCTD13+SULTA3</i>   | Not significant                           |
| 15 | <i>KCTD13+ASPHD1</i>   | Not significant                           |
| 16 | <i>KCTD13+DOC2A</i>    | Not significant                           |
| 17 | <i>KCTD13+GIYD2</i>    | Not significant                           |
| 18 | <i>KCTD13+SPN</i>      | Not significant                           |
| 19 | <i>KCTD13+MAZ</i>      | Not significant                           |
| 20 | <i>KCTD13+HIRIP3</i>   | Not significant                           |
| 21 | <i>KCTD13+INO80E</i>   | Not significant                           |
| 22 | <i>KCTD13+ALDOA</i>    | Not significant                           |
| 23 | <i>KCTD13+PPP4C</i>    | Not significant                           |
| 24 | <i>KCTD13+CORO1A</i>   | Not significant                           |
| 25 | <i>KCTD13+GDPD3</i>    | Not significant                           |
| 26 | <i>KCTD13+C16orf54</i> | Not significant                           |
| 27 | <i>KCTD13+C16orf92</i> | Not significant                           |
| 28 | <i>KCTD13+TMEM219</i>  | Not significant                           |
| 29 | <i>KCTD13+TAOK2</i>    | Not significant                           |

**Suppl. Table 3: MLPA probes.** Probe locations for all 29 MLPA probes, including those within the 118 kb 16p11.2 putative critical region tested here (“Narrow”, three genes), probes outside of this critical region but still within the 16p11.2 microdeletion region (“Broad”, two genes) to enable assessment of full segment CNV compared to dosage alteration of the restricted region alone, and four control probes outside of the 16p11 region.

| <b>Gene</b> | <b>Probe ID</b> | <b>Probe target</b> | <b>Amplicon size (bp)</b> | <b>Chr. location</b> | <b>Region</b> |        |
|-------------|-----------------|---------------------|---------------------------|----------------------|---------------|--------|
| MVP         | D-MVP-Ex1       | Exon 1              | 112                       | 16p11.2              | Narrow        |        |
|             | D-MVP-Ex2       | Exon 2              | 178                       | 16p11.2              | Narrow        |        |
|             | D-MVP-Ex3       | Exon3               | 96                        | 16p11.2              | Narrow        |        |
|             | D-MVP-Ex4       | Exon 4              | 168                       | 16p11.2              | Narrow        |        |
|             | D-MVP-Ex5       | Exon 5              | 132                       | 16p11.2              | Narrow        |        |
|             | D-MVP-Ex6       | Exon 6              | 188                       | 16p11.2              | Narrow        |        |
|             | D-MVP-Ex7       | Exon 7              | 144                       | 16p11.2              | Narrow        |        |
|             | D-MVP-Ex9       | Exon 9              | 105                       | 16p11.2              | Narrow        |        |
|             | D-MVP-Ex11      | Exon11              | 163                       | 16p11.2              | Narrow        |        |
|             | D-MVP-Ex12      | Exon12              | 152                       | 16p11.2              | Narrow        |        |
|             | D-MVP-Ex13      | Exon13              | 120                       | 16p11.2              | Narrow        |        |
|             | D-MVP-Ex14      | Exon14              | 157                       | 16p11.2              | Narrow        |        |
|             | CDIPT           | D-CDIPT-Ex2         | Exon 2                    | 183                  | 16p11.2       | Narrow |
|             |                 | D-CDIPT-Ex3         | Exon 3                    | 128                  | 16p11.2       | Narrow |
| D-CDIPT-Ex4 |                 | Exon 4              | 136                       | 16p11.2              | Narrow        |        |
| D-CDIPT-Ex5 |                 | Exon 5              | 193                       | 16p11.2              | Narrow        |        |
| D-CDIPT-Ex6 |                 | Exon 6              | 140                       | 16p11.2              | Narrow        |        |
| KCTD13      | D-KCTD13-int1   | Intron 1            | 148                       | 16p11.2              | Narrow        |        |
|             | D-KCTD13-int2   | Intron 2            | 116                       | 16p11.2              | Narrow        |        |
|             | D-KCTD13-int2a  | Intron 2            | 198                       | 16p11.2              | Narrow        |        |
|             | D-KCTD13-Ex4    | Exon 4              | 173                       | 16p11.2              | Narrow        |        |
|             | D-KCTD13-int5   | Intron 5            | 102                       | 16p11.2              | Narrow        |        |
|             | D-KCTD13-Ex6    | Exon 6              | 203                       | 16p11.2              | Narrow        |        |
| TAOK2       | TAOK_16p11.2    | Exon 3              | 107                       | 16p11.2              | Broad         |        |
| TBX6        | TBX6_16p11.2    | Exon 3              | 114                       | 16p11.2              | Broad         |        |
| TITF1       | D-TITF-E2       | Exon 2              | 100                       | 14q13                | Control       |        |
| USP32       | D-USP-intron2   | Intron 2            | 98                        | 17q23                | Control       |        |
| GCH1        | GCH1E5-R        | Exon 5              | 110                       | 14q22                | Control       |        |
| Parkin      | parkin-Ex8      | Exon 8              | 124                       | 6q25.2               | Control       |        |
